# Supplementary material for: Multiscale assessment of North American terrestrial carbon balance
Source: Copernicus journal article supplement (doi:10.5194/bg-2023-111), 2023-08-03
Supplement: Supplementary file 1 [file bg-2023-111-supplement.pdf]

# Supporting Information for Multiscale assessment of North American terrestrial carbon balance

Kelsey T. Foster<sup>1,2</sup>, Wu Sun<sup>1</sup>, Yoichi P. Shiga<sup>3</sup>, Jiafu Mao<sup>4</sup>, Anna M. Michalak<sup>1,2</sup>

<sup>1</sup> Department of Global Ecology, Carnegie Institution for Science, Stanford, 94305, USA

5 <sup>2</sup> Department of Earth System Science, Stanford University, Stanford, 94305, USA

<sup>3</sup> Independent Researcher, San Francisco, CA, USA

<sup>4</sup> Environmental Sciences Division and Climate Change Science Institute, Oak Ridge National Laboratory, Oak Ridge, 37830, USA

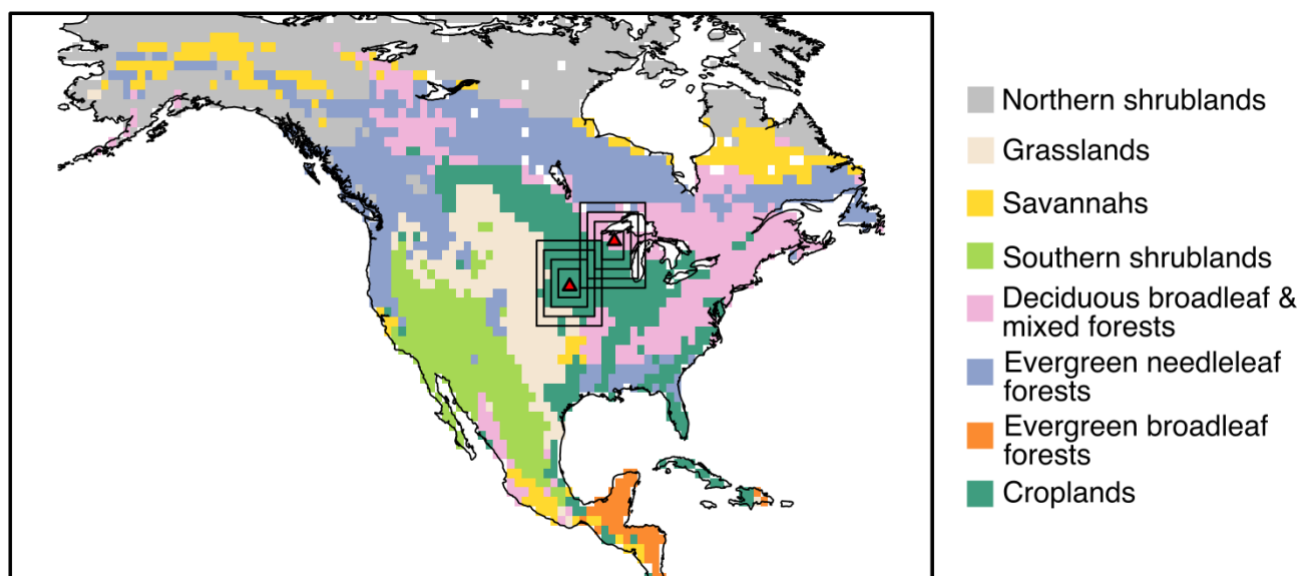

10 **Figure S1: Map of biomes in North America with the locations of two continuous-monitoring towers and outlines visualizing the**  
regions where consistency is evaluated. Red triangles represent locations of towers with high temporal coverage where there are  
also eddy covariance flux towers nearby. The innermost outlined boxes around each red triangle represents the 3° x 3° box,  
15 centered on the 1° x 1° grid cell, where consistency is evaluated by determining whether the TBM or inversion ensemble has the  
smaller standard deviation across all models within each ensemble. The remaining consecutive outlined boxes represent the 5° x  
5°, 7° x 7°, and 9° x 9° scales where consistency is also evaluated.

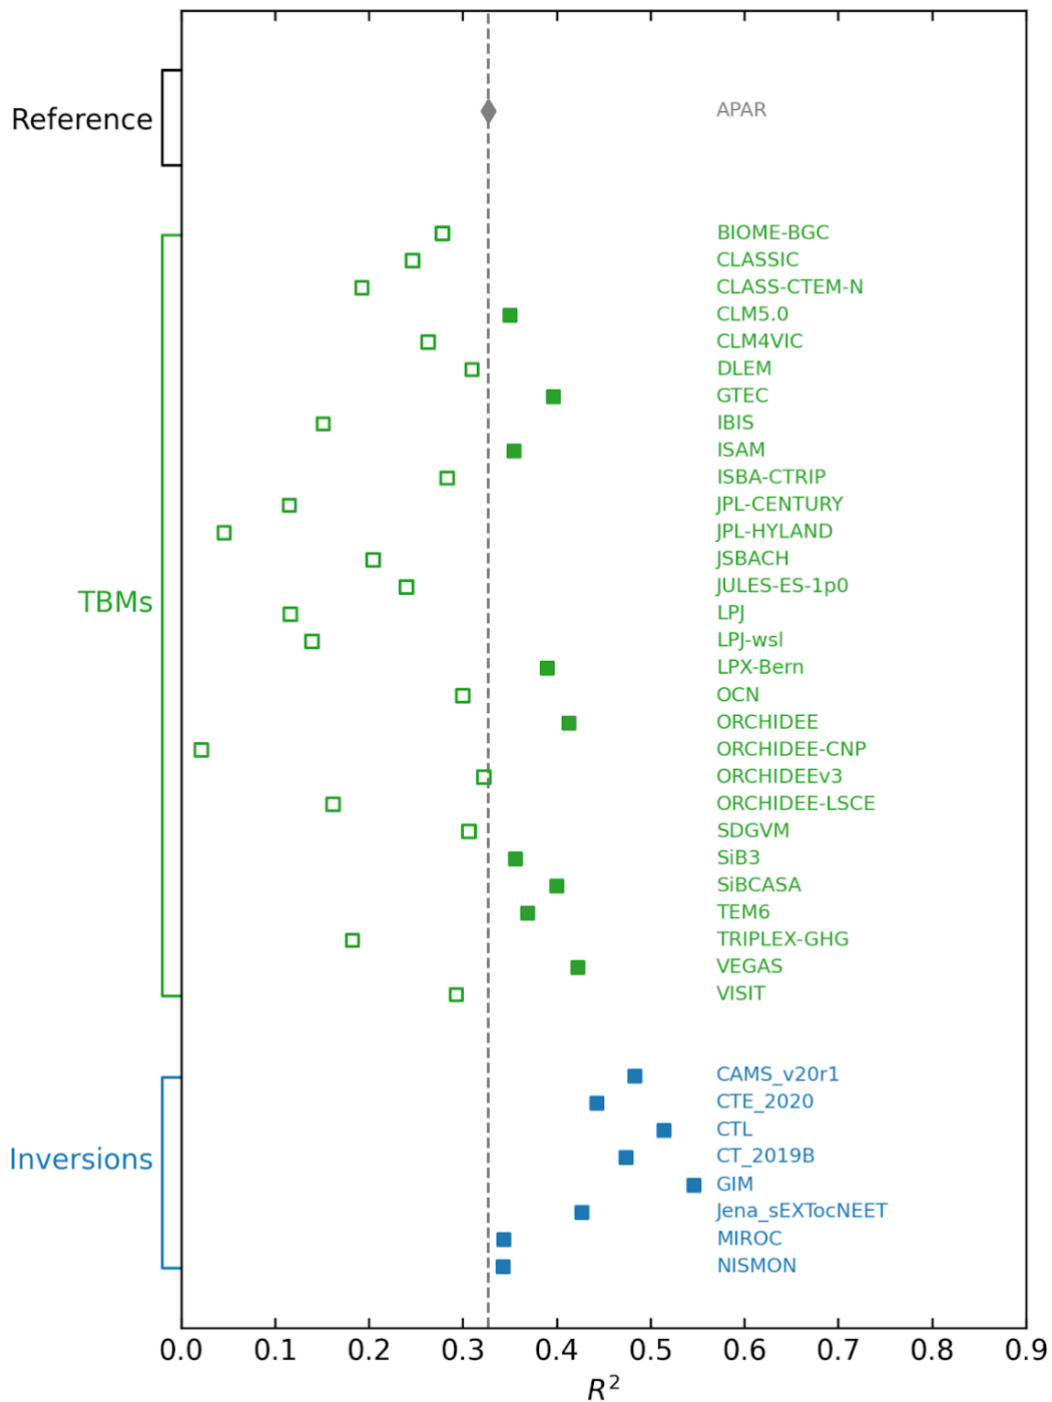

20 **Figure S2:** The fraction of variance in atmospheric 3-hourly CO<sub>2</sub> explained by monthly mean fluxes ( $R^2$ ). Filled squares represent models with an  $R^2$  greater than APAR's  $R^2$ .

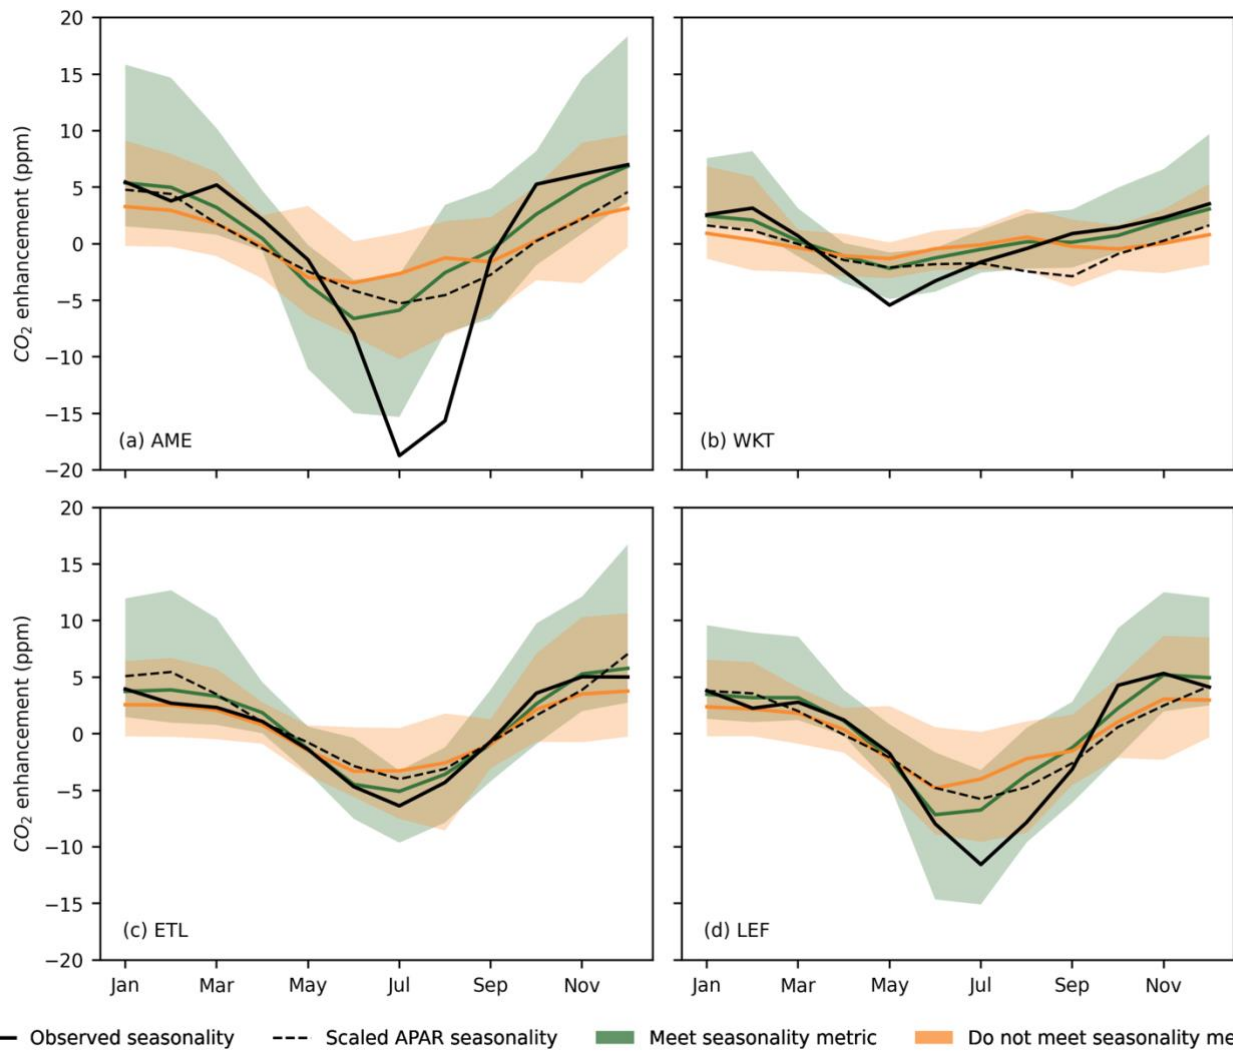

25 **Figure S3: Monthly averaged seasonal cycles of observed CO<sub>2</sub> enhancements and CO<sub>2</sub> enhancements resulting from modeled**  
**carbon fluxes from TBMs. The black line represents the seasonality observed at each tower site and the dotted line is the**  
**seasonality of rescaled APAR (see Sect. 2.3). The green line is the mean of models that meet the seasonality metric (i.e., at least two**  
**of the seasonality sub-metrics) at all four sites and the green shading represents the full range of these estimates. The orange line is**  
**the mean of models that do not meet the seasonality metrics at all four sites and the orange shading represents the full range of**  
 30 **these estimates.**

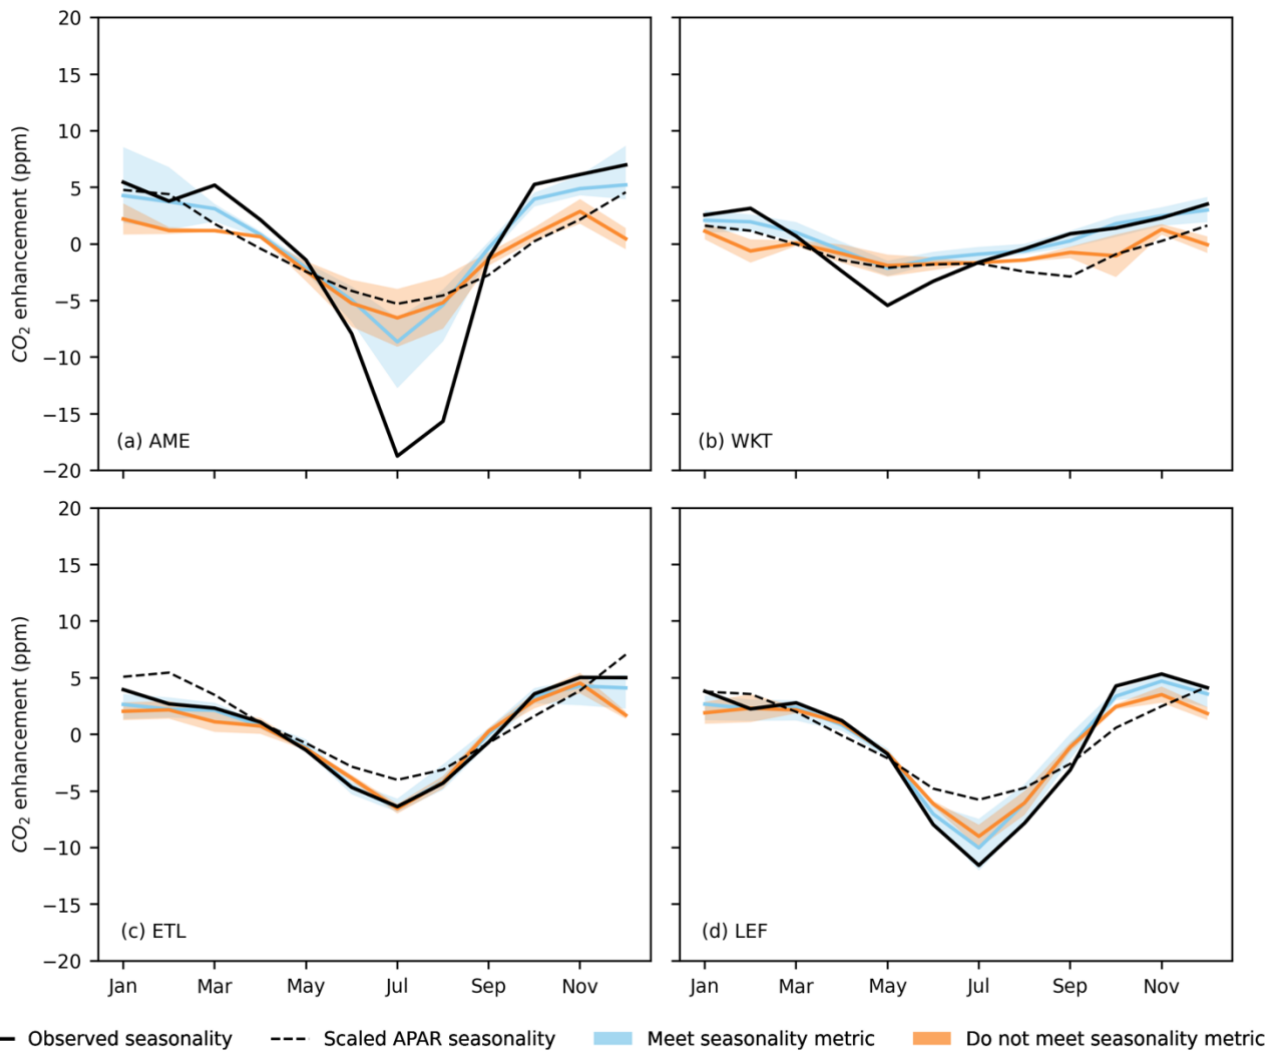

35 **Figure S4: Monthly averaged seasonal cycles of observed CO<sub>2</sub> enhancements and CO<sub>2</sub> enhancements resulting from modeled carbon fluxes from inversions. The black line represents the seasonality observed at each tower site and the dotted line is the seasonality of rescaled APAR (see Sect. 2.3). The blue line is the mean of models that meet the seasonality criteria (i.e., at least two of the seasonality sub-metrics) at all four sites and the blue shading represents the full range of these estimates. The orange line is the mean of models that do not meet the seasonality metrics at all four sites and the orange shading represents the full range of these estimates.**

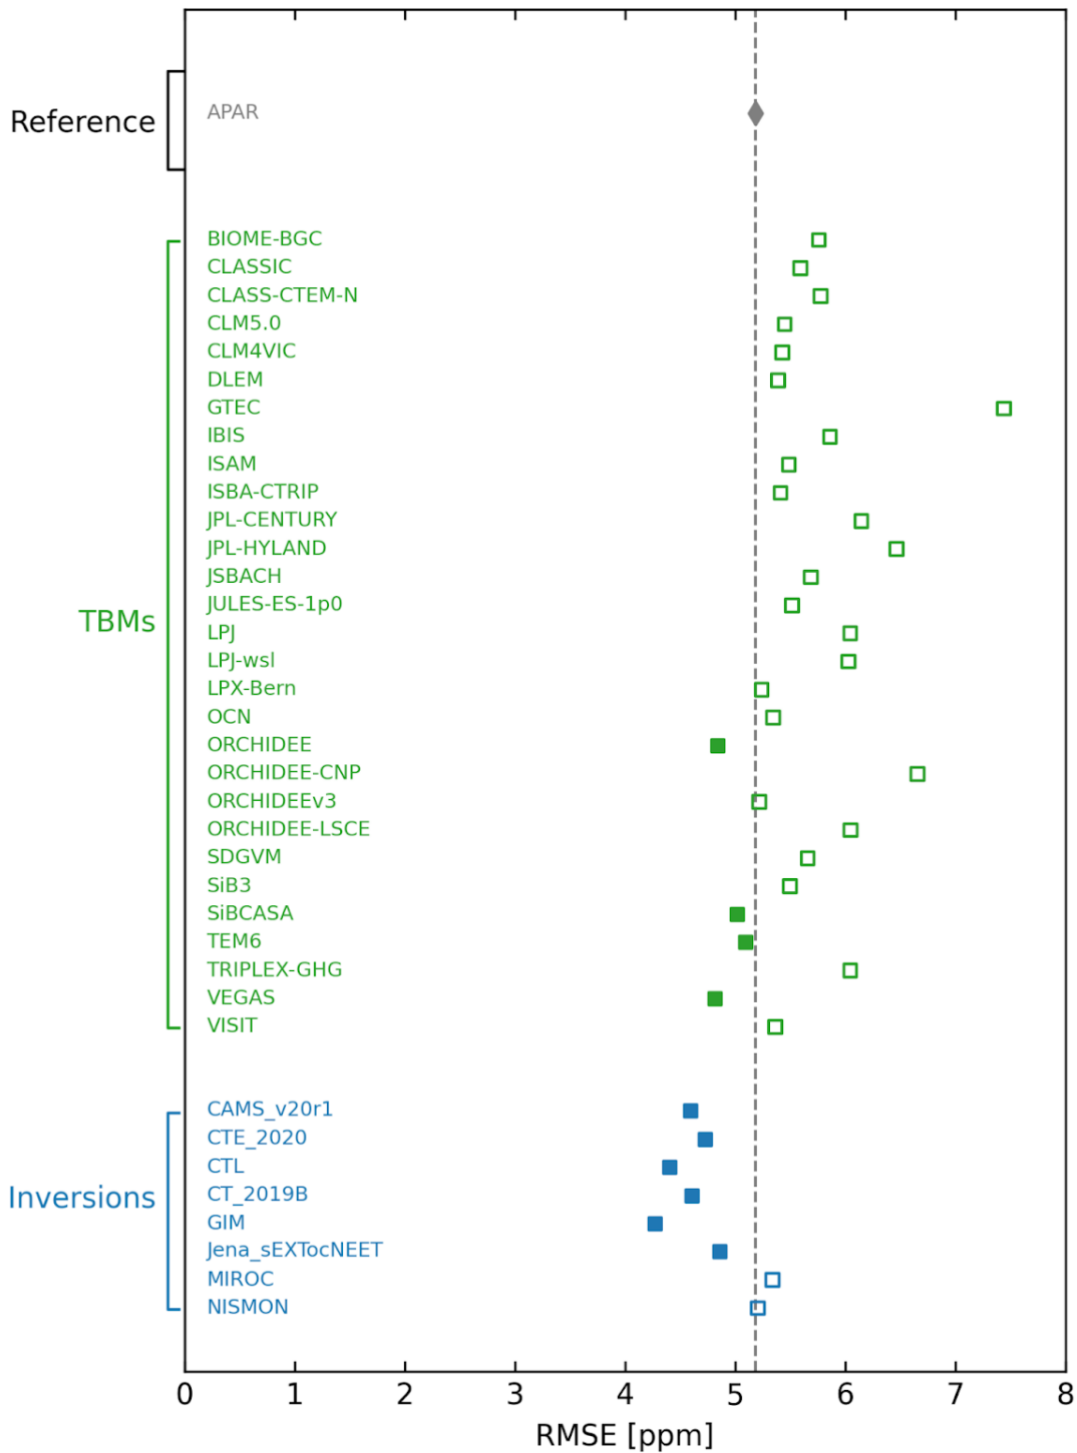

40 **Figure S5: The root mean squared error (RMSE) between measured atmospheric 3-hourly CO<sub>2</sub> and modeled monthly CO<sub>2</sub> signals. Filled squares represent models that have a smaller RMSE than the RMSE of rescaled APAR.**

| <b>Site Name</b> | <b>Site Location</b>                              | <b>Latitude</b> | <b>Longitude</b> | <b>Height (m)</b> | <b>Principal Investigators</b>                       |
|------------------|---------------------------------------------------|-----------------|------------------|-------------------|------------------------------------------------------|
| AAC              | Austin Cary Memorial Forest, Gainesville, FL, USA | 29.7381         | -82.2188         | 32                | Natasha Miles, Scott Richardson, and Ken Davis (PSU) |
| ACR              | Chestnut Ridge, TX, USA                           | 35.9311         | -84.3324         | 61                | Natasha Miles, Scott Richardson, and Ken Davis (PSU) |
| ACV              | Canaan Valley, WV, USA                            | 39.119          | -79.4523         | 7                 | Natasha Miles, Scott Richardson, and Ken Davis (PSU) |
| AME              | Mead, NE, USA                                     | 41.1649         | -96.4701         | 4.5               | Natasha Miles, Scott Richardson, and Ken Davis (PSU) |
| AMT              | Argyle, ME, USA                                   | 45.0346         | -68.6821         | 107               | Arlyn Andrews (NOAA)                                 |
| AOZ              | Ozark, MO, USA                                    | 38.7441         | -92.2            | 30                | Natasha Miles, Scott Richardson, and Ken Davis (PSU) |
| BAO              | Boulder Atmospheric Observatory, CO, USA          | 40.05           | -105.004         | 300               | Arlyn Andrews (NOAA)                                 |
| BCK              | Behchoko, NT, Canada                              | 62.7979         | -115.918         | 60                | Doug Worthy (EC)                                     |
| BRA              | Bratt's Lake, SK, Canada                          | 50.2016         | -104.711         | 35                | Doug Worthy (EC)                                     |
| BRW              | Barrow Atmospheric Baseline Observatory, AK, USA  | 71.323          | -156.6114        | 16.46             | Kirk Thoning and Pieter Tans (NOAA)                  |
| CDL              | Candle Lake, SK, Canada                           | 53.9871         | -105.1179        | 30                | Doug Worthy (EC)                                     |
| CHM              | Chibougamau, QC, Canada                           | 49.6925         | -74.3423         | 30                | Doug Worthy (EC)                                     |
| EGB              | Egbert, ON, Canada                                | 44.231          | -79.7838         | 3                 | Doug Worthy (EC)                                     |
| ESP              | Estevan Point, BC, Canada                         | 49.3829         | -126.544         | 40                | Doug Worthy (EC)                                     |
| EST              | Esther, AB, Canada                                | 51.67           | -110.206         | 3                 | Doug Worthy (EC)                                     |
| ETL              | East Trout Lake, SK, Canada                       | 54.3537         | -104.987         | 105               | Doug Worthy (EC)                                     |
| FPK              | Fort Peck, MT, USA                                | 48.3079         | -105.1017        | 3                 | Natasha Miles, Scott Richardson, and Ken Davis (PSU) |
| FSD              | Fraserdale, ON, Canada                            | 49.8752         | -81.5698         | 40                | Doug Worthy (EC)                                     |

|      |                                                 |         |           |      |                                                             |
|------|-------------------------------------------------|---------|-----------|------|-------------------------------------------------------------|
| HDP  | Hidden Peak, UT, USA                            | 40.56   | -111.65   | 17.7 | Britton Stephens (NCAR)                                     |
| HFM  | Harvard Forest, MA, USA                         | 42.5378 | -72.1714  | 29   | Steve Wofsy and Bill Munger (Harvard)                       |
| KCMP | Rosemount Research and Outreach Center, MN, USA | 44.6886 | -93.0728  | 200  | Tim Griffis (UMN)                                           |
| LEF  | Park Falls, WI, USA                             | 45.9453 | -90.2744  | 396  | Arlyn Andrews (NOAA)                                        |
| LLB  | Lac La Biche, AB, Canada                        | 54.9538 | -112.467  | 10   | Doug Worthy (EC)                                            |
| MVY  | Marthas Vineyard, MA, USA                       | 41.325  | -70.5667  | 10   | Colm Sweeney (NOAA)                                         |
| NWR  | Niwot Ridge, CO, USA                            | 40.0531 | -105.5864 | 5.1  | Britton Stephens (NCAR)                                     |
| OFR  | Fir, OR, USA                                    | 44.6465 | -123.5514 | 38   | Beverly Law (Oregon State) and Andres Schmidt (RWTH Aachen) |
| OMP  | Mary's Peak, OR, USA                            | 44.5043 | -123.553  | 10   | Beverly Law (Oregon State) and Andres Schmidt (RWTH Aachen) |
| OMT  | Meolius, OR, USA                                | 44.4524 | -121.5572 | 33   | Beverly Law (Oregon State) and Andres Schmidt (RWTH Aachen) |
| ONG  | Burns, OR, USA                                  | 43.4704 | -119.691  | 6    | Beverly Law (Oregon State) and Andres Schmidt (RWTH Aachen) |
| OYQ  | Yaquina Head, OR, USA                           | 44.675  | -124.067  | 12   | Beverly Law (Oregon State) and Andres Schmidt (RWTH Aachen) |
| RBA  | Roof Butte, AZ                                  | 36.4614 | -109.0956 | 21.9 | Britton Stephens (NCAR)                                     |
| RCE  | Centerville, IA, USA                            | 40.7919 | -92.8775  | 110  | Natasha Miles, Scott Richardson, and Ken Davis (PSU)        |
| RGV  | Galesville, WI, USA                             | 44.091  | -91.3382  | 140  | Natasha Miles, Scott Richardson, and Ken Davis (PSU)        |
| RKW  | Kewanee, IL, USA                                | 41.2762 | -89.9724  | 140  | Natasha Miles, Scott Richardson, and Ken Davis (PSU)        |
| RMM  | Mead, NE, USA                                   | 41.1386 | -96.4559  | 120  | Natasha Miles, Scott Richardson, and Ken Davis (PSU)        |
| RRL  | Round Lake, MN, USA                             | 43.5263 | -95.4137  | 110  | Natasha Miles, Scott Richardson, and Ken Davis (PSU)        |
| SCT  | Beech Island, SC, USA                           | 33.4057 | -81.8334  | 305  | Arlyn Andrews (NOAA) and Matt                               |

|     |                                   |         |           |     |                                                  |
|-----|-----------------------------------|---------|-----------|-----|--------------------------------------------------|
|     |                                   |         |           |     | Parker (SRNL)                                    |
| SGP | Southern Great Plains, OK, USA    | 36.607  | -97.489   | 60  | Sebastien Biraud and Margaret Torn (LBNL)        |
| SNP | Shenandoah National Park, VA, USA | 38.617  | -78.35    | 17  | Arlyn Andrews (NOAA) and Stephan De Wekker (UVA) |
| SPL | Storm Peak Laboratory, CO, USA    | 40.45   | -106.73   | 9.1 | Britton Stephens (NCAR)                          |
| WBI | West Branch, IA, USA              | 41.7248 | -91.3529  | 379 | Arlyn Andrews (NOAA)                             |
| WGC | Walnut Grove, CA, USA             | 38.265  | -121.4911 | 483 | Arlyn Andrews (NOAA) and Marc Fischer (LBNL)     |
| WKT | Moody, TX, USA                    | 31.3149 | -97.3269  | 457 | Arlyn Andrews (NOAA)                             |
| WSA | Sable Island, NS, Canada          | 43.9323 | -60.0126  | 25  | Doug Worthy (EC)                                 |

**Table S1: Tower sites for atmospheric CO<sub>2</sub> observations from ObsPack CO<sub>2</sub> GLOBALVIEWplus v3.2.**
